# Supplementary material for: The Inflammatory Markers of Multisystem Inflammatory Syndrome in children (MIS-C) and Adolescents During the COVID-19 Pandemic: A Meta-Analysis
Source: Research Square preprint supplement (doi:10.21203/rs.3.rs-127768/v1), 2021-02-04
Supplement: Supplementary file 1 [file c36dcf3c6db978974446d1cc.pdf]

# **The Inflammatory Markers of Multisystem Inflammatory Syndrome in children (MIS-C) and adolescents during the COVID-19 Pandemic: A Meta-analysis**

Yan Zhao<sup>1</sup>, Li-juan Yin<sup>2\*</sup>, Jenil Patel<sup>3</sup>, Lei Tang<sup>1</sup> and Ying Huang<sup>2</sup>

## **Affiliations:**

<sup>1</sup>Department of Pediatrics, People's Hospital of Chongqing Banan District, Chongqing, 401320, China.

<sup>2</sup>Department of Respiratory Medicine, Children's Hospital of Chongqing Medical University; National Clinical Research Center for Child Health and Disorders; Ministry of Education Key Laboratory of Child Development and Disorders; China International Science and Technology Cooperation Base of Child Development and Critical Disorders; Chongqing Key Laboratory of Pediatrics; Chongqing, 400014, China. Electronic address: [yudishengyin4356@sina.com](mailto:yudishengyin4356@sina.com).

<sup>3</sup>Department of Epidemiology, Fay W. Boozman College of Public Health, University of Arkansas for Medical Sciences

## **Corresponding Author:**

Lijuan Yin, Electronic address: [yudishengyin4356@sina.com](mailto:yudishengyin4356@sina.com); Address: Children's Hospital of Chongqing Medical University, Zhongshan Second Road of Yuzhong District, Chongqing 400014, China; Telephone: +86 13983885611.

**Word count:** 2993

eFigure 2: forest plots of MIS-C vs. COVID-19

eFigure 3: forest plots of MIS-C vs. severe/non-severe COVID-19

eFigure 4: forest plots of MIS-C vs. KD

eFigure 5: forest plots of severe MIS-C vs. non-severe MIS-C

eFigure 6: forest plots of MIS-C with coronary artery abnormality vs. MIS-C without coronary artery abnormality

eFigure 7: forest plots of KD during SARS-CoV-2 epidemic vs. before SARS-CoV-2 epidemic

eTable in the Supplement

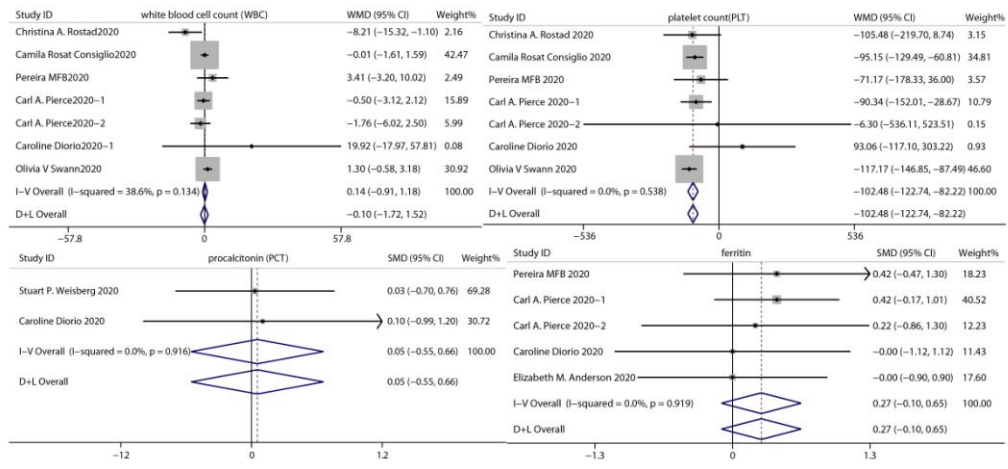

eFigure 2: forest plots of MIS-C vs. COVID-19

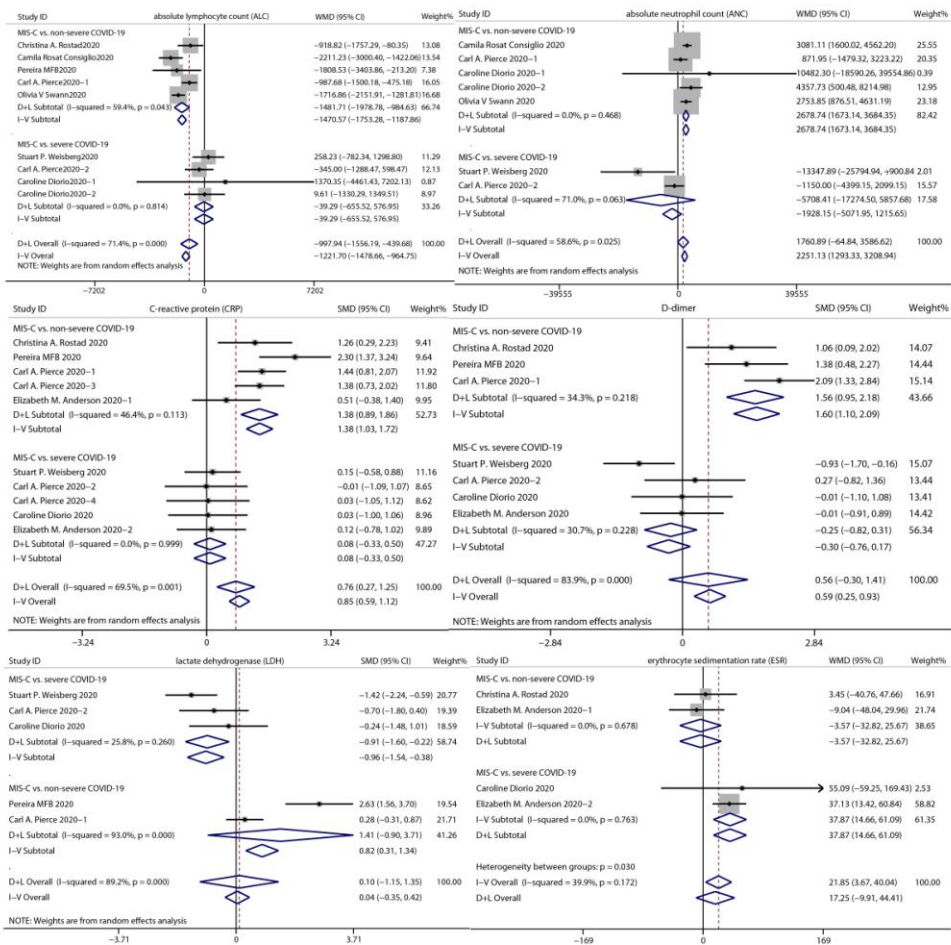

eFigure 3: forest plots of MIS-C vs. severe/non-severe COVID-19

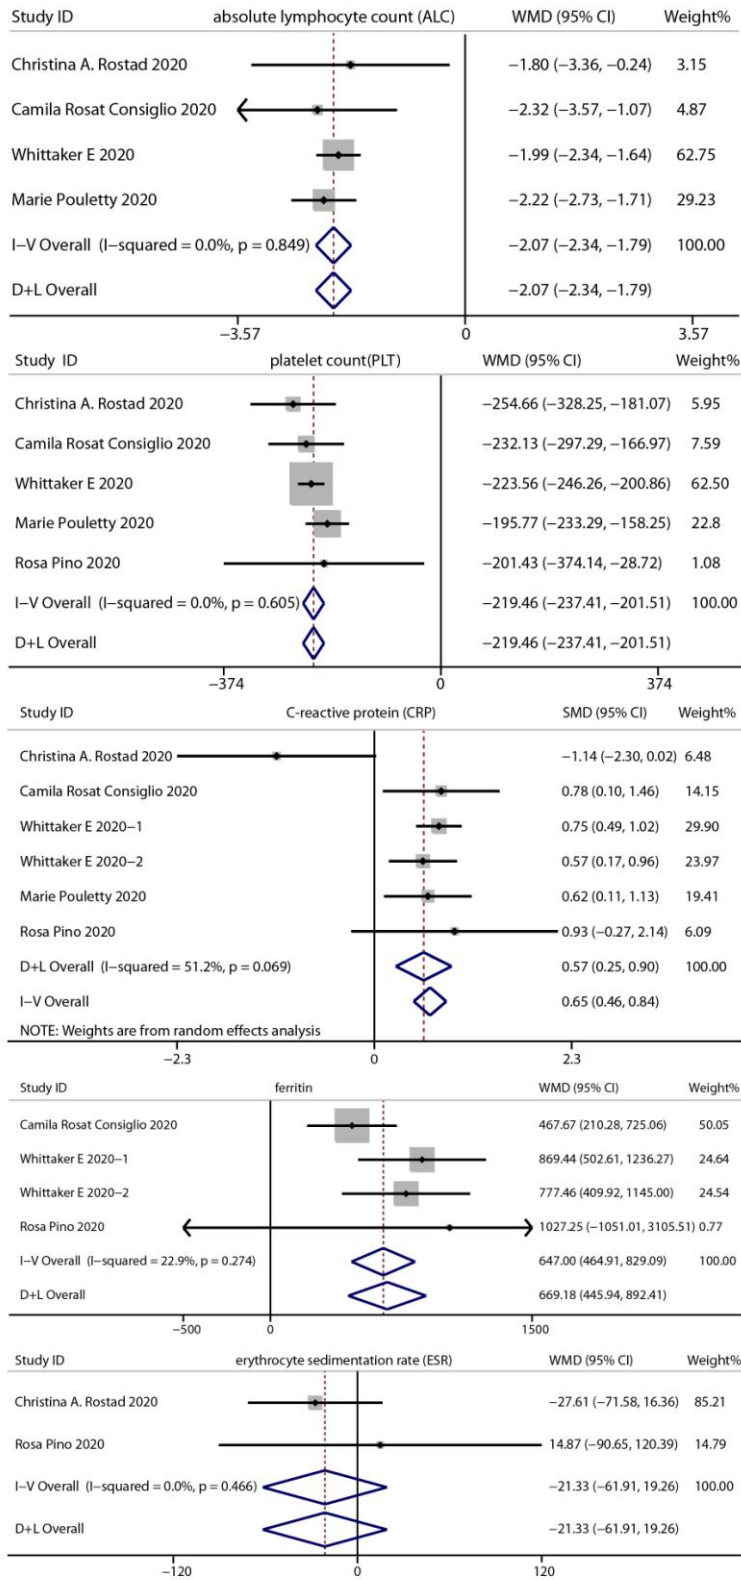

Figure 4: forest plots of MIS-C vs. KD

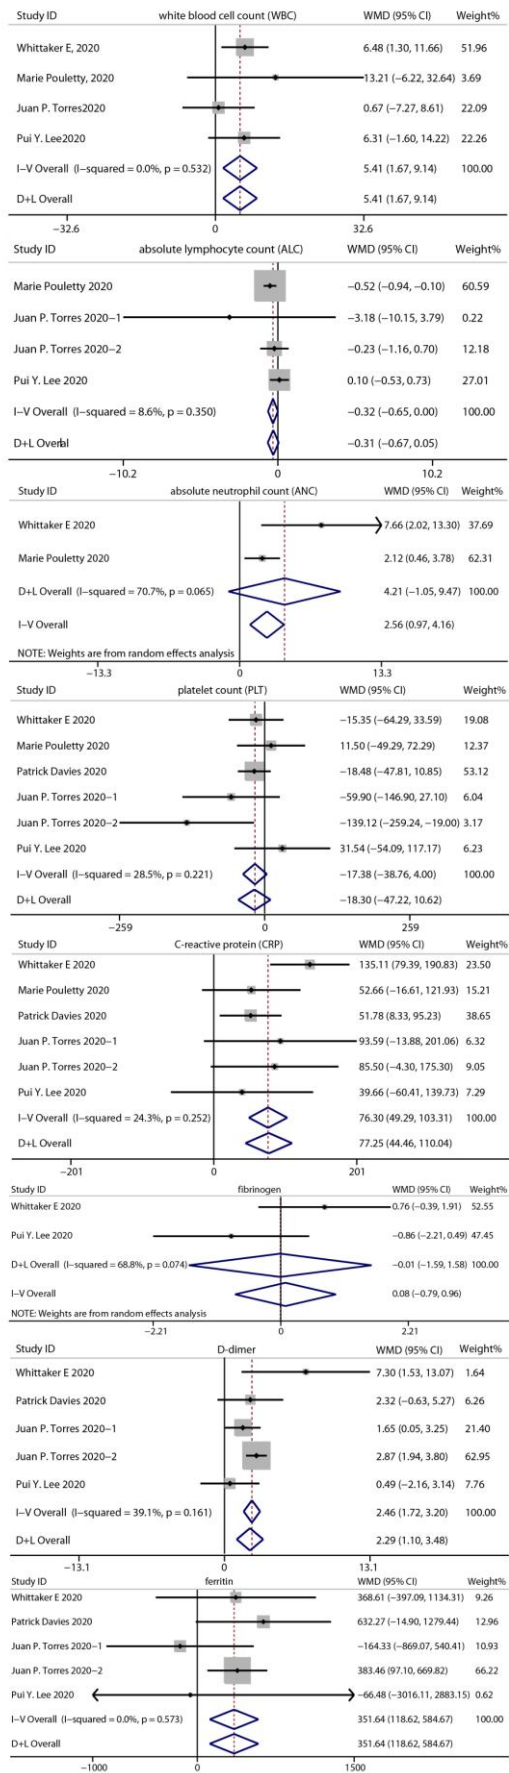

Figure 5: forest plots of severe MIS-C vs. non-severe MIS-C

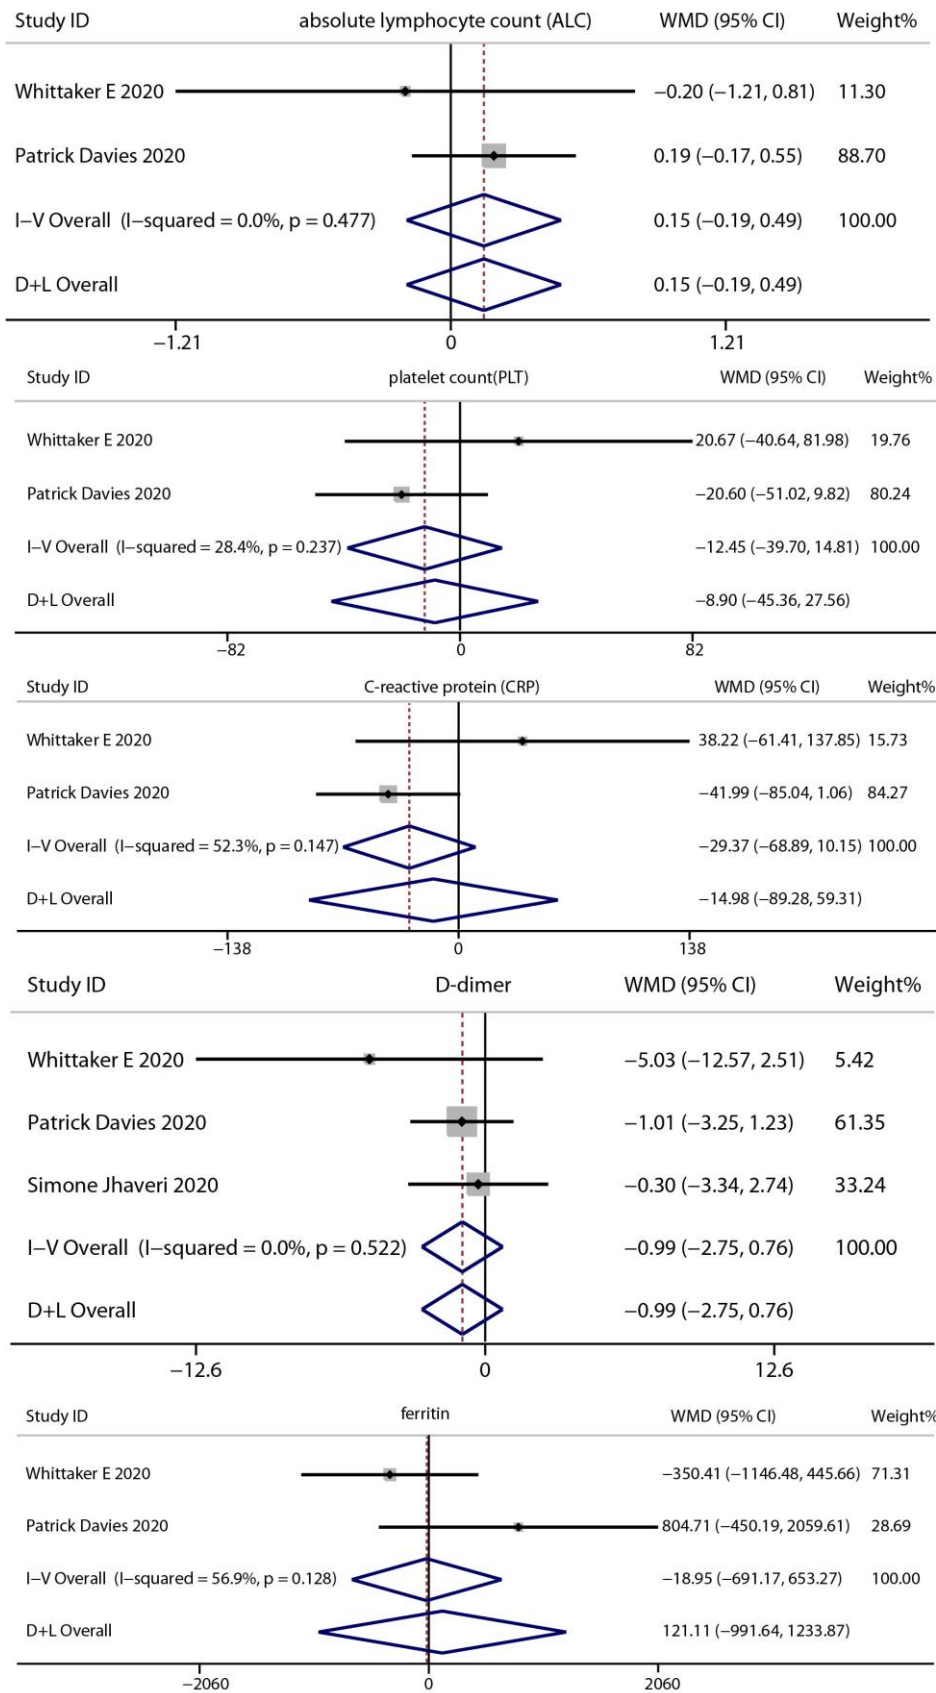

eFigure 6: forest plots of MIS-C with coronary artery abnormality vs. MIS-C without coronary artery abnormality

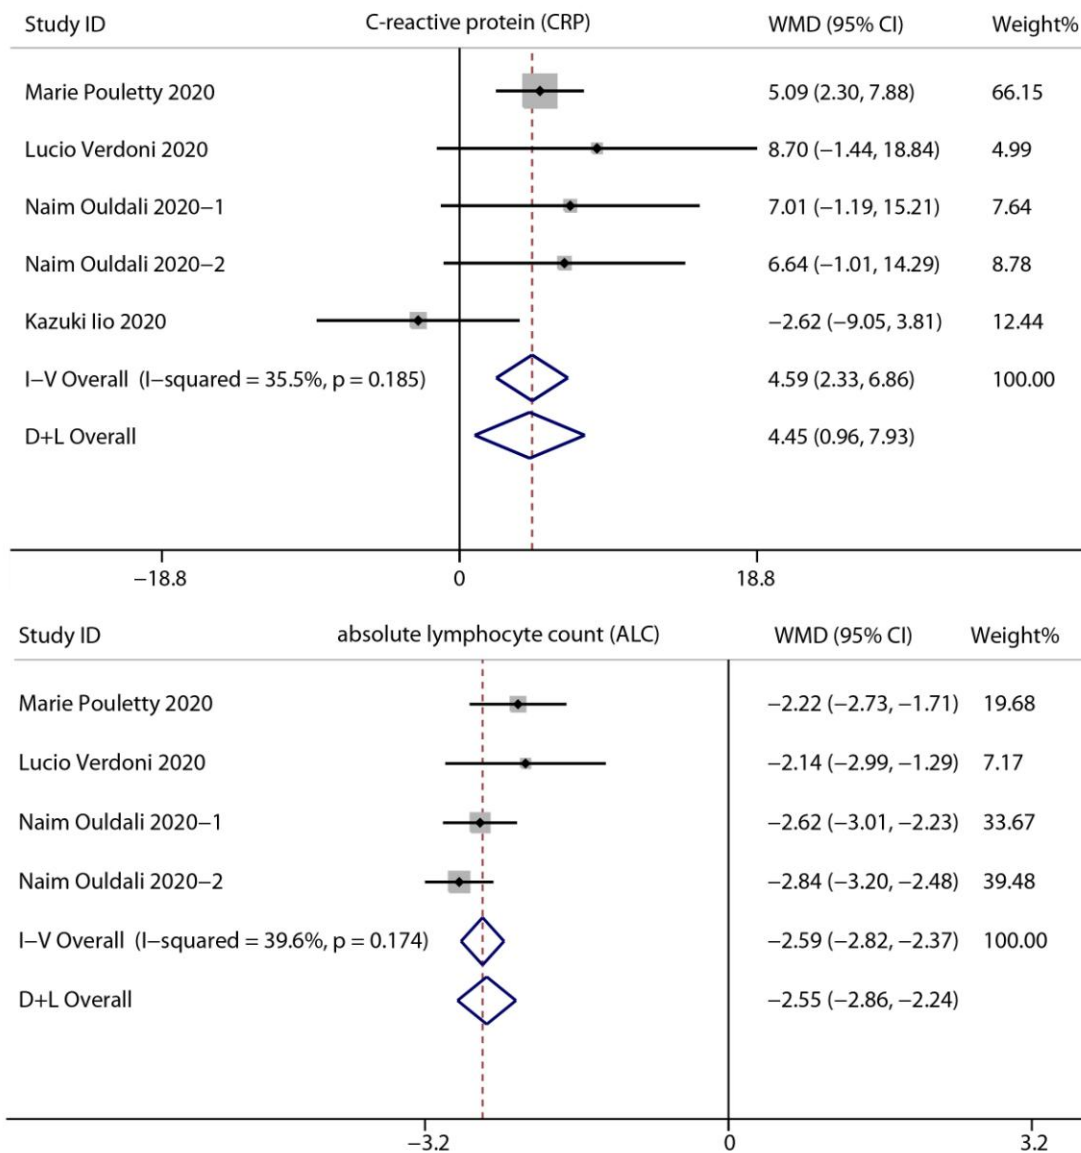

eFigure 7: forest plots of KD during SARS-CoV-2 epidemic vs. before SARS-CoV-2 epidemic



eTable in the Supplement

*Risk of bias assessment (case-control study)*

| Study Author/Year        | Selection                |                         |                       |                        | Comparability | Outcome                   |                    |                   | Score |
|--------------------------|--------------------------|-------------------------|-----------------------|------------------------|---------------|---------------------------|--------------------|-------------------|-------|
|                          | Case definition adequacy | Representative of cases | Selection of controls | Definition of controls |               | Ascertainment of exposure | Same ascertainment | Non-response rate |       |
| Pereira MFB2020          | *                        | *                       |                       | *                      | **            | *                         | *                  |                   | 7     |
| Elizabeth M. Dufort 2020 | *                        | *                       |                       |                        | **            | *                         | *                  | *                 | 7     |
| Naim Ouldali2020         | *                        | *                       |                       | *                      | *             | *                         | *                  |                   | 6     |
| Kazuki Iio2020           | *                        | *                       | *                     | *                      | **            | *                         | *                  |                   | 8     |

*Risk of bias assessment(cohort study)*

| Study Author/Year           | Selection                                |                                     |                           |                                                                          | Comparability | Outcome               |                                                 |                                  | Score |
|-----------------------------|------------------------------------------|-------------------------------------|---------------------------|--------------------------------------------------------------------------|---------------|-----------------------|-------------------------------------------------|----------------------------------|-------|
|                             | Representativeness of the Exposed Cohort | Selection of the Non-Exposed Cohort | Ascertainment of Exposure | Demonstration That Outcome of Interest Was Not Present at Start of Study |               | Assessment of Outcome | Was Follow-Up Long Enough for Outcomes to Occur | Adequacy of Follow-Up of Cohorts |       |
| Christina A. Rostad2020     | *                                        | *                                   | *                         |                                                                          | *             | *                     | *                                               | *                                | 7     |
| Camila Rosat Consiglio 2020 | *                                        | *                                   | *                         |                                                                          | *             | *                     | *                                               |                                  | 6     |
| Stuart P. Weisberg2020      | *                                        | *                                   | *                         |                                                                          | *             | *                     | *                                               |                                  | 6     |
| Carl A. Pierce              | *                                        | *                                   | *                         |                                                                          | *             | *                     | *                                               | *                                | 7     |
| Caroline Diorio2020         | *                                        | *                                   | *                         | *                                                                        | **            | *                     | *                                               |                                  | 8     |
| Elizabeth M. Anderson 2020  | *                                        | *                                   | *                         | *                                                                        | *             | *                     | *                                               |                                  | 7     |
| Olivia V Swann2020          | *                                        | *                                   | *                         | *                                                                        | **            | *                     | *                                               |                                  | 8     |

|                           |   |   |   |       |
|---------------------------|---|---|---|-------|
| 0                         |   |   |   |       |
| Whittaker<br>E 2020       | * | * | * | * *   |
| Marie<br>Pouletty<br>2020 | * | * | * | * * * |
| Patrick<br>Davies202<br>0 | * | * | * | * *   |
| Rosa<br>Pino2020          | * | * | * | * * * |
| Juan P.<br>Torres202<br>0 | * | * | * | * *   |
| Pui Y.<br>Lee2020         | * | * | * | * *   |
| Simone<br>Jhaveri20<br>20 | * | * | * | * * * |
| L.R.<br>Feldstein2<br>020 | * | * | * | * *   |
| Lucio<br>Verdoni20<br>20  | * | * | * | * * * |
